# Supplementary material
Source: Springer Nature journal article supplement (https://www.springermedizin.de/resource/supplementary/12885_2008_1279_MOESM3_ESM.pdf/9471626)

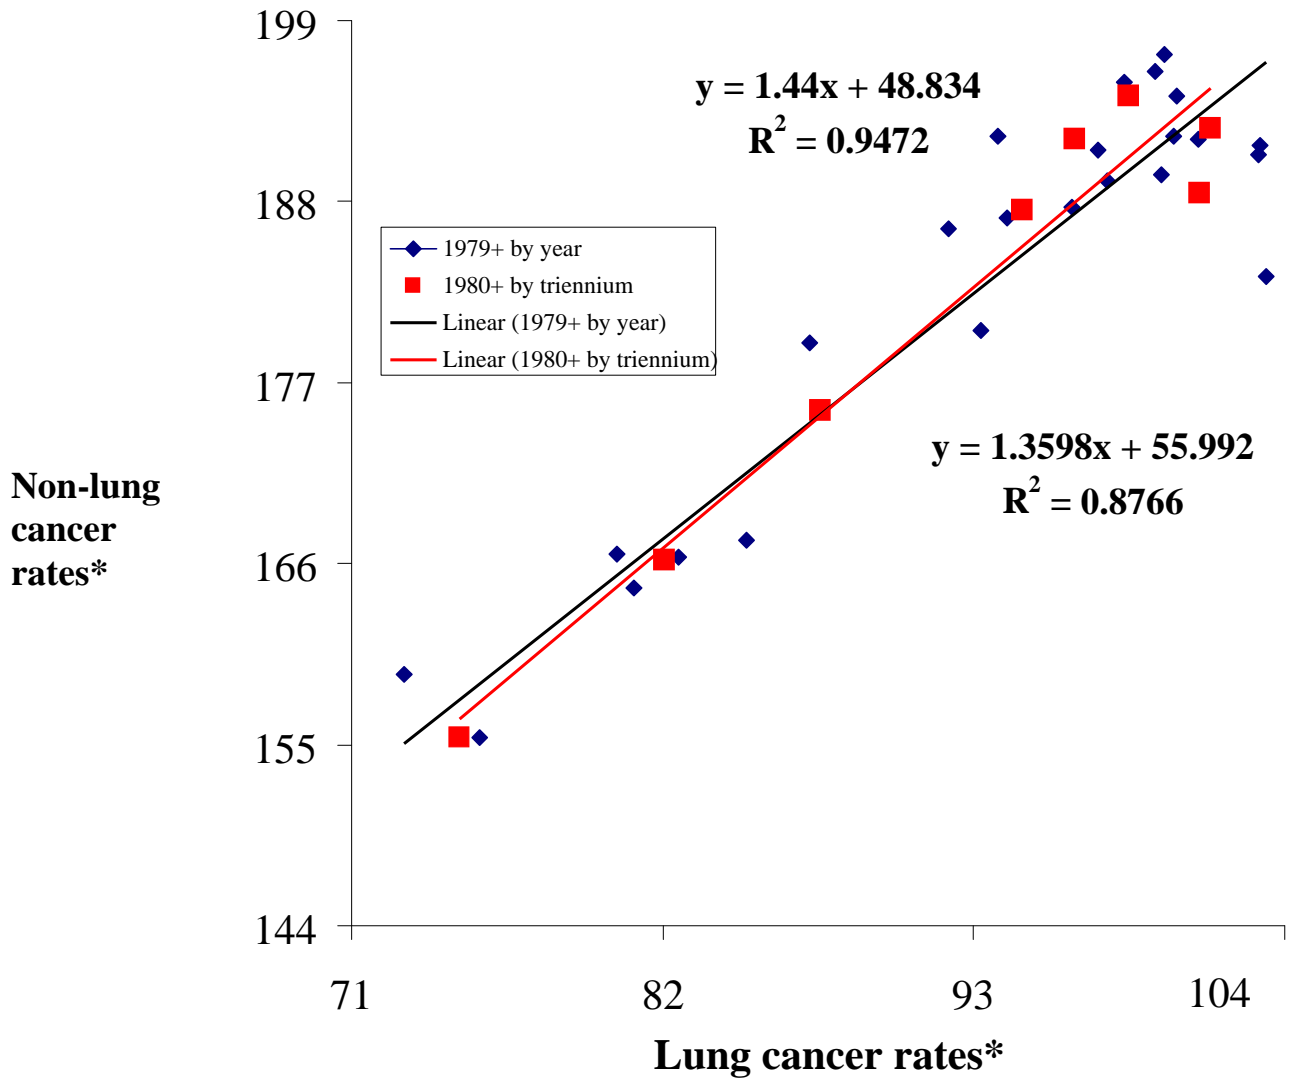

\*Deaths/100,000 adjusted to the 2000 US age standard

Supplement: MOESM3 [file 9471626]
